# Supplementary material
Source: PubMed Central journal article supplement (PMC8817914)
Supplement: tpj20154supp.pdf [file tpj20154supp.pdf]

**Appendix Figure 1. Influenza vaccine uptake by age group, 2007-2017, Kaiser Permanente Southern California**

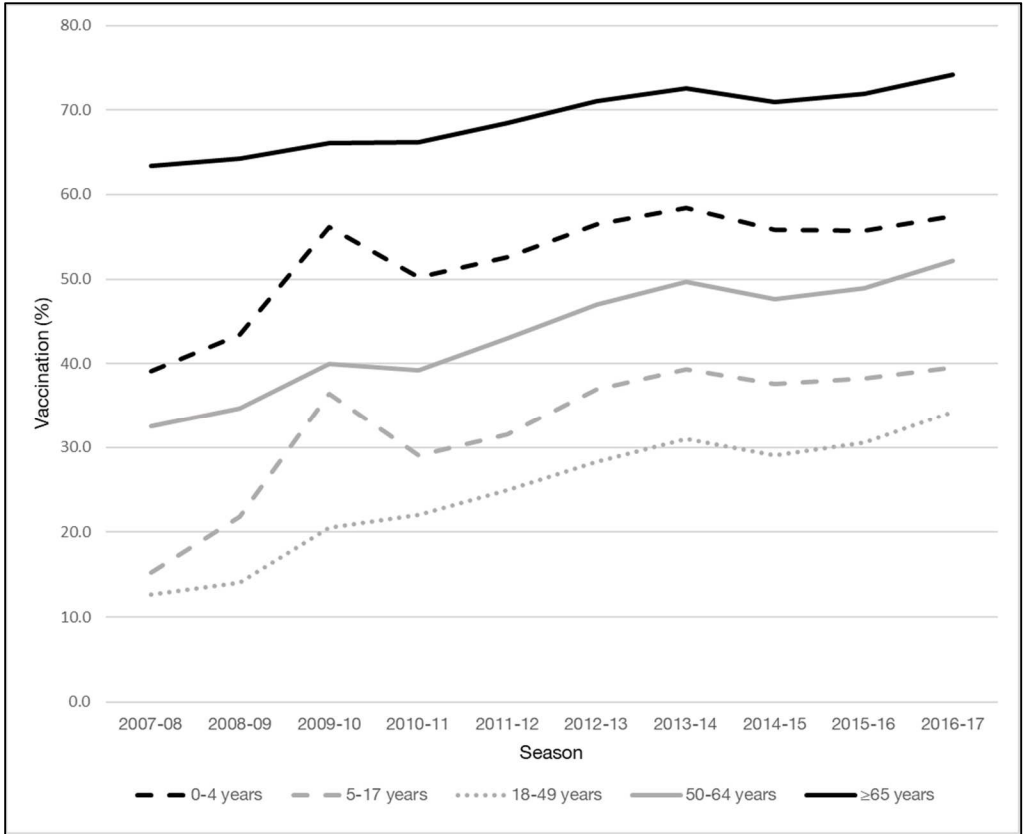

**Appendix Figure 2. Influenza vaccine uptake by race/ethnicity, 2007-2017, Kaiser Permanente Southern California**

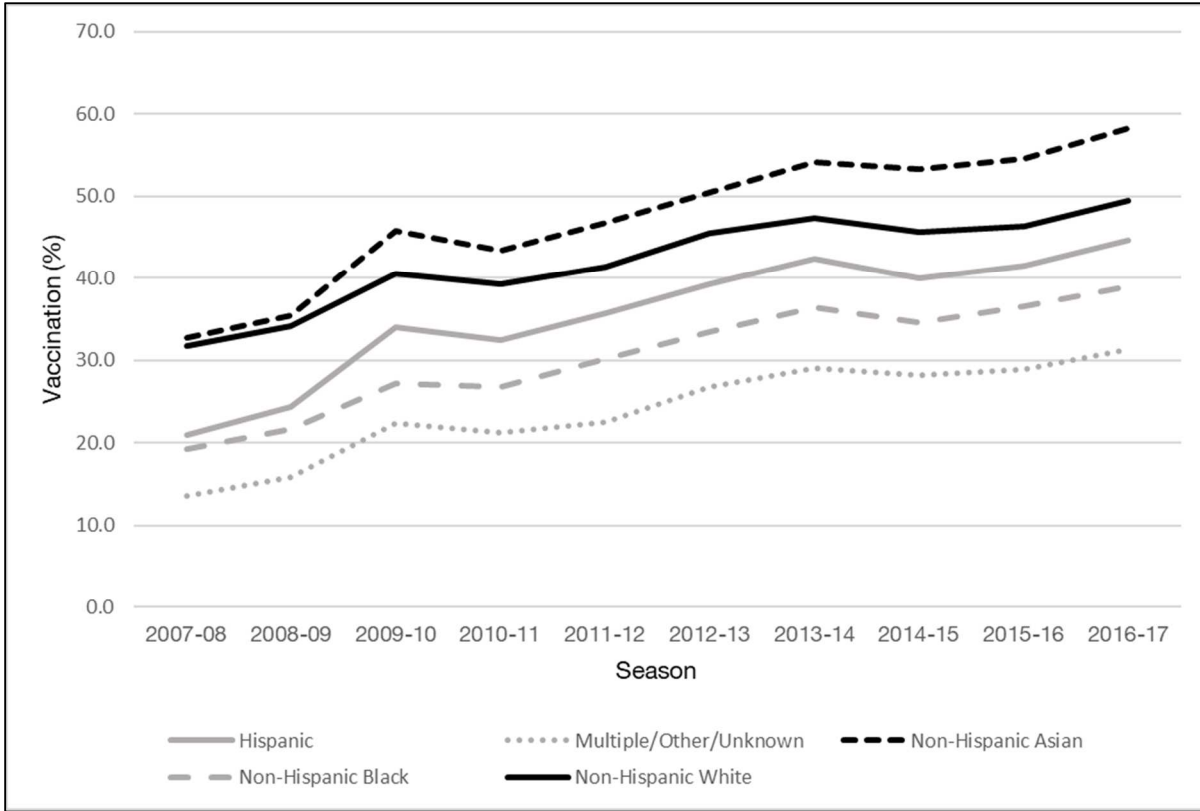

**Appendix Figure 3: Influenza season outcomes by race/ethnicity, 2007-2017, Kaiser Permanente Southern California**

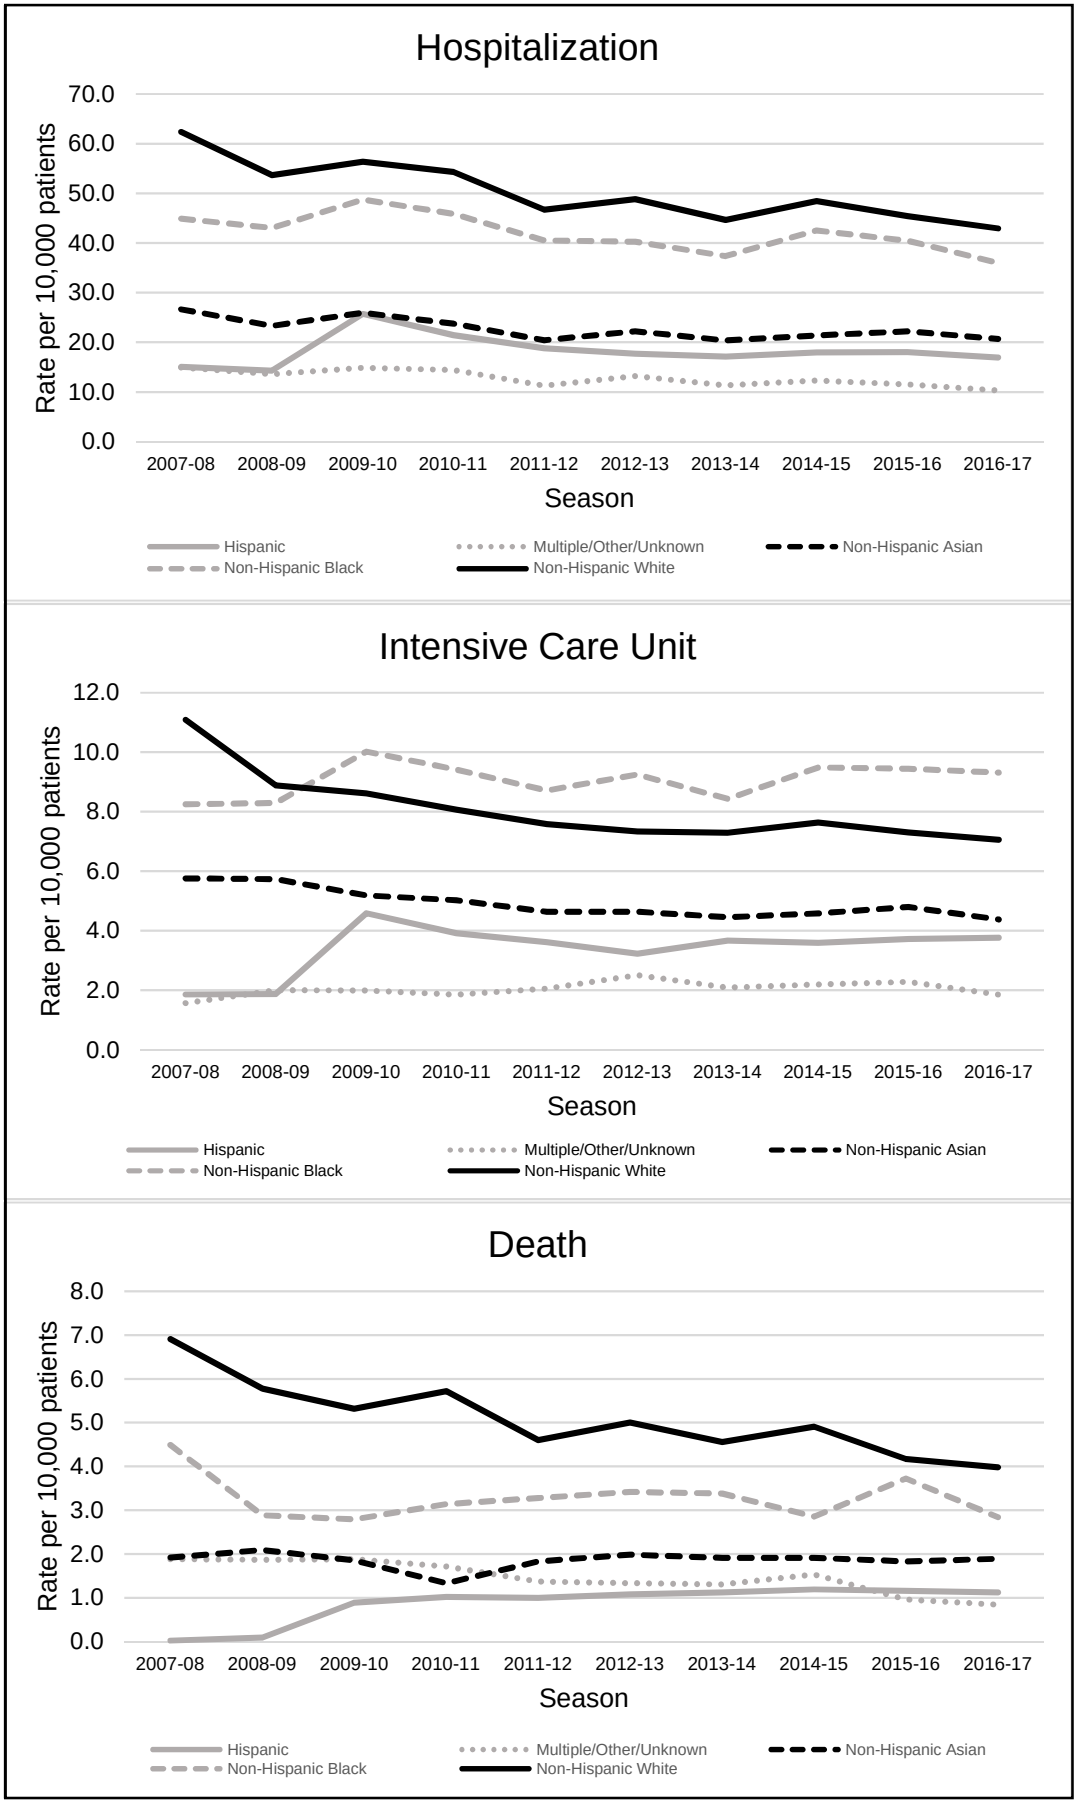

**Appendix Table 1: Influenza vaccine uptake by age group, sex, and race/ethnicity, 2007-2017, Kaiser Permanente Southern California**

|                        | Season  |         |         |         |         |         |         |         |         |         | Total Rate | 95% CI*      | P-value** |
|------------------------|---------|---------|---------|---------|---------|---------|---------|---------|---------|---------|------------|--------------|-----------|
|                        | 2007-08 | 2008-09 | 2009-10 | 2010-11 | 2011-12 | 2012-13 | 2013-14 | 2014-15 | 2015-16 | 2016-17 |            |              |           |
| <b>Total</b>           | 23.9    | 26.8    | 34.8    | 33.7    | 36.6    | 40.6    | 43.3    | 41.4    | 42.5    | 45.5    | 37.4       | (37.4, 37.4) |           |
| <b>Age group</b>       |         |         |         |         |         |         |         |         |         |         |            |              |           |
| 0-4 years              | 39.1    | 43.4    | 56.2    | 50.2    | 52.6    | 56.5    | 58.4    | 55.8    | 55.7    | 57.5    | 52.7       | (52.7, 52.8) | <0.001    |
| 5-17 years             | 15.2    | 21.8    | 36.4    | 29.1    | 31.5    | 36.9    | 39.3    | 37.6    | 38.2    | 39.5    | 32.7       | (32.7, 32.7) |           |
| 18-49 years            | 12.7    | 14.1    | 20.5    | 22.0    | 25.0    | 28.3    | 31.0    | 29.1    | 30.6    | 34.3    | 25.3       | (25.3, 25.3) |           |
| 50-64 years            | 32.5    | 34.7    | 40.0    | 39.2    | 43.0    | 47.0    | 49.7    | 47.6    | 48.9    | 52.2    | 44.0       | (44.0, 44.0) |           |
| ≥65 years              | 63.4    | 64.3    | 66.1    | 66.2    | 68.5    | 71.0    | 72.6    | 70.9    | 71.9    | 74.2    | 69.5       | (69.5, 69.6) |           |
| <b>Sex</b>             |         |         |         |         |         |         |         |         |         |         |            |              |           |
| Female                 | 26.1    | 29.0    | 37.4    | 36.4    | 39.5    | 43.6    | 46.5    | 44.8    | 46.0    | 49.2    | 40.4       | (40.4, 40.4) | <0.001    |
| Male                   | 21.5    | 24.4    | 32.0    | 30.8    | 33.5    | 37.4    | 39.8    | 37.9    | 38.9    | 41.6    | 34.2       | (34.2, 34.2) |           |
| <b>Race/ethnicity</b>  |         |         |         |         |         |         |         |         |         |         |            |              |           |
| Hispanic               | 21.0    | 24.3    | 34.0    | 32.4    | 35.7    | 39.2    | 42.4    | 40.0    | 41.5    | 44.6    | 36.7       | (36.7, 36.8) | <0.001    |
| Multiple/Other/Unknown | 13.5    | 15.8    | 22.4    | 21.2    | 22.5    | 26.8    | 29.1    | 28.2    | 28.9    | 31.3    | 23.1       | (23.1, 23.1) |           |
| Non-Hispanic Asian     | 32.7    | 35.4    | 45.8    | 43.3    | 46.8    | 50.5    | 54.2    | 53.3    | 54.6    | 58.3    | 48.8       | (48.8, 48.9) |           |
| Non-Hispanic Black     | 19.3    | 21.6    | 27.2    | 26.8    | 30.1    | 33.5    | 36.4    | 34.5    | 36.6    | 39.0    | 30.8       | (30.7, 30.8) |           |
| Non-Hispanic White     | 31.7    | 34.2    | 40.6    | 39.3    | 41.4    | 45.5    | 47.4    | 45.6    | 46.3    | 49.5    | 42.5       | (42.5, 42.5) |           |

\* Exact 95% CIs for the binomial proportions

\*\* P-value was calculated using Chi-square test

**Appendix Table 2: Influenza-related hospitalization rate by age group, sex and race/ethnicity per 10,000 patients, 2007-2017, Kaiser Permanente Southern California**

|                             | Season  |         |         |         |         |         |         |         |         |         | Total Rate | 95% CI*        | P-value** |
|-----------------------------|---------|---------|---------|---------|---------|---------|---------|---------|---------|---------|------------|----------------|-----------|
|                             | 2007-08 | 2008-09 | 2009-10 | 2010-11 | 2011-12 | 2012-13 | 2013-14 | 2014-15 | 2015-16 | 2016-17 |            |                |           |
| <b>Influenza season</b>     |         |         |         |         |         |         |         |         |         |         |            |                |           |
| <b>Total</b>                | 35.4    | 31.5    | 37.0    | 34.8    | 30.1    | 30.9    | 28.4    | 30.5    | 29.0    | 26.8    | 31.2       | (31.0, 31.4)   |           |
| <b>Age group</b>            |         |         |         |         |         |         |         |         |         |         |            |                |           |
| 0-4 years                   | 34.9    | 28.5    | 45.4    | 35.4    | 23.0    | 21.8    | 15.4    | 16.3    | 18.1    | 16.9    | 25.3       | (24.5, 26.1)   | <0.001    |
| 5-17 years                  | 5.0     | 5.8     | 9.2     | 6.7     | 5.3     | 4.1     | 2.9     | 4.2     | 4.4     | 3.7     | 5.1        | (4.9, 5.3)     |           |
| 18-49 years                 | 9.3     | 8.1     | 11.3    | 9.0     | 7.7     | 6.9     | 7.3     | 6.9     | 7.1     | 5.6     | 7.8        | (7.7, 7.9)     |           |
| 50-64 years                 | 35.7    | 32.0    | 37.2    | 32.5    | 28.7    | 29.0    | 28.6    | 26.6    | 27.5    | 23.3    | 29.8       | (29.4, 30.2)   |           |
| ≥65 years                   | 197.7   | 170.5   | 177.1   | 174.0   | 152.6   | 155.2   | 133.4   | 146.1   | 132.4   | 127.2   | 153.0      | (151.9, 154.1) |           |
| <b>Sex</b>                  |         |         |         |         |         |         |         |         |         |         |            |                |           |
| Female                      | 34.2    | 29.8    | 35.6    | 32.8    | 28.1    | 29.0    | 26.7    | 29.2    | 27.2    | 25.2    | 29.6       | (29.3, 29.8)   | <0.001    |
| Male                        | 36.6    | 33.3    | 38.5    | 36.8    | 32.4    | 33.0    | 30.3    | 31.9    | 30.9    | 28.5    | 33.0       | (32.7, 33.3)   |           |
| <b>Race/ethnicity</b>       |         |         |         |         |         |         |         |         |         |         |            |                |           |
| Hispanic                    | 15.0    | 14.3    | 25.7    | 21.5    | 18.8    | 17.7    | 17.1    | 18.0    | 18.1    | 16.9    | 18.3       | (18.0, 18.5)   | <0.001    |
| Multiple/Other/Unknown      | 14.9    | 13.6    | 14.9    | 14.4    | 11.3    | 13.2    | 11.3    | 12.3    | 11.5    | 10.3    | 12.9       | (12.6, 13.3)   |           |
| Non-Hispanic Asian          | 26.7    | 23.3    | 26.0    | 23.8    | 20.4    | 22.2    | 20.4    | 21.4    | 22.2    | 20.7    | 22.4       | (21.9, 23.0)   |           |
| Non-Hispanic Black          | 44.9    | 43.0    | 48.8    | 45.8    | 40.5    | 40.3    | 37.3    | 42.5    | 40.5    | 36.0    | 41.8       | (41.1, 42.6)   |           |
| Non-Hispanic White          | 62.4    | 53.7    | 56.4    | 54.3    | 46.7    | 48.9    | 44.7    | 48.5    | 45.4    | 42.9    | 50.0       | (49.6, 50.4)   |           |
| <b>Non-influenza season</b> |         |         |         |         |         |         |         |         |         |         |            |                |           |
| <b>Total</b>                | 12.5    | 14.4    | 13.0    | 12.2    | 10.9    | 11.0    | 10.7    | 11.5    | 10.1    | 10.4    | 11.6       | (11.5, 11.7)   |           |

\* Exact 95% CIs for the binomial proportions

\*\* P-value was calculated using Chi-square test

**Appendix Table 3: Influenza-related intensive care unit admission rate by age group, sex and race/ethnicity per 10,000 patients, 2007-2017, Kaiser Permanente Southern California**

|                             | Season  |         |         |         |         |         |         |         |         |         | Total Rate | 95% CI*      | P-value** |
|-----------------------------|---------|---------|---------|---------|---------|---------|---------|---------|---------|---------|------------|--------------|-----------|
|                             | 2007-08 | 2008-09 | 2009-10 | 2010-11 | 2011-12 | 2012-13 | 2013-14 | 2014-15 | 2015-16 | 2016-17 |            |              |           |
| <b>Influenza season</b>     |         |         |         |         |         |         |         |         |         |         |            |              |           |
| <b>Total</b>                | 5.9     | 5.3     | 6.2     | 5.7     | 5.4     | 5.3     | 5.3     | 5.5     | 5.4     | 5.2     | 5.5        | (5.4, 5.6)   |           |
| <b>Age group</b>            |         |         |         |         |         |         |         |         |         |         |            |              |           |
| 0-4 years                   | 2.2     | 1.5     | 6.2     | 3.5     | 2.8     | 2.8     | 2.8     | 2.4     | 3.6     | 3.6     | 3.1        | (2.9, 3.4)   | <0.001    |
| 5-17 years                  | 0.6     | 0.4     | 1.4     | 1.0     | 0.9     | 0.9     | 0.7     | 0.9     | 1.1     | 0.7     | 0.9        | (0.8, 0.9)   |           |
| 18-49 years                 | 1.5     | 1.3     | 2.0     | 1.7     | 1.5     | 1.2     | 1.5     | 1.3     | 1.3     | 1.1     | 1.4        | (1.4, 1.5)   |           |
| 50-64 years                 | 7.1     | 6.7     | 7.0     | 6.2     | 5.8     | 6.1     | 6.3     | 5.9     | 6.0     | 5.3     | 6.2        | (6.0, 6.4)   |           |
| ≥65 years                   | 33.5    | 28.8    | 28.4    | 27.5    | 26.8    | 25.0    | 22.8    | 24.3    | 22.9    | 23.2    | 25.8       | (25.3, 26.3) |           |
| <b>Sex</b>                  |         |         |         |         |         |         |         |         |         |         |            |              |           |
| Female                      | 5.3     | 4.9     | 5.5     | 4.9     | 4.6     | 4.7     | 4.7     | 5.1     | 4.5     | 4.4     | 4.8        | (4.7, 4.9)   | <0.001    |
| Male                        | 6.6     | 5.7     | 6.9     | 6.6     | 6.3     | 6.0     | 6.0     | 5.9     | 6.3     | 5.9     | 6.2        | (6.1, 6.3)   |           |
| <b>Race/ethnicity</b>       |         |         |         |         |         |         |         |         |         |         |            |              |           |
| Hispanic                    | 1.9     | 1.9     | 4.6     | 3.9     | 3.6     | 3.2     | 3.7     | 3.6     | 3.7     | 3.8     | 3.5        | (3.4, 3.6)   | <0.001    |
| Multiple/Other/Unknown      | 1.6     | 2.0     | 2.0     | 1.9     | 2.1     | 2.5     | 2.1     | 2.2     | 2.3     | 1.9     | 2.0        | (1.9, 2.1)   |           |
| Non-Hispanic Asian          | 5.8     | 5.7     | 5.2     | 5.0     | 4.6     | 4.6     | 4.5     | 4.6     | 4.8     | 4.4     | 4.9        | (4.6, 5.1)   |           |
| Non-Hispanic Black          | 8.3     | 8.3     | 10.0    | 9.4     | 8.7     | 9.3     | 8.4     | 9.5     | 9.4     | 9.3     | 9.1        | (8.7, 9.4)   |           |
| Non-Hispanic White          | 11.1    | 8.9     | 8.6     | 8.1     | 7.6     | 7.3     | 7.3     | 7.6     | 7.3     | 7.1     | 8.0        | (7.9, 8.2)   |           |
| <b>Non-influenza season</b> |         |         |         |         |         |         |         |         |         |         |            |              |           |
| <b>Total</b>                | 2.3     | 2.6     | 2.4     | 2.0     | 2.0     | 2.1     | 2.1     | 2.0     | 2.0     | 2.0     | 2.1        | (2.1, 2.2)   |           |

\* Exact 95% CIs for the binomial proportions

\*\* P-value was calculated using Chi-square test

**Appendix Table 4: Influenza-related death rate by age group, sex and race/ethnicity per 10,000 patients, 2007-2017, Kaiser Permanente Southern California**

|                             | Season  |         |         |         |         |         |         |         |         |         | Total Rate | 95% CI*      | P-value** |
|-----------------------------|---------|---------|---------|---------|---------|---------|---------|---------|---------|---------|------------|--------------|-----------|
|                             | 2007-08 | 2008-09 | 2009-10 | 2010-11 | 2011-12 | 2012-13 | 2013-14 | 2014-15 | 2015-16 | 2016-17 |            |              |           |
| <b>Influenza season</b>     |         |         |         |         |         |         |         |         |         |         |            |              |           |
| <b>Total</b>                | 3.4     | 2.9     | 2.9     | 3.0     | 2.6     | 2.8     | 2.6     | 2.8     | 2.5     | 2.3     | 2.8        | (2.7, 2.8)   |           |
| <b>Age group</b>            |         |         |         |         |         |         |         |         |         |         |            |              |           |
| 0-4 years                   | 0.1     | 0.1     | 0.1     | 0.0     | 0.0     | 0.1     | 0.3     | 0.3     | 0.1     | 0.1     | 0.1        | (0.1, 0.2)   | <0.001    |
| 5-17 years                  | 0.0     | 0.1     | 0.0     | 0.1     | 0.1     | 0.0     | 0.0     | 0.0     | 0.0     | 0.0     | 0.0        | (0.0, 0.1)   |           |
| 18-49 years                 | 0.3     | 0.2     | 0.3     | 0.3     | 0.2     | 0.2     | 0.3     | 0.2     | 0.2     | 0.2     | 0.2        | (0.2, 0.3)   |           |
| 50-64 years                 | 2.0     | 1.6     | 1.6     | 1.7     | 1.5     | 1.6     | 1.6     | 1.4     | 1.3     | 1.3     | 1.5        | (1.4, 1.5)   |           |
| ≥65 years                   | 26.1    | 21.7    | 20.8    | 20.7    | 17.8    | 18.4    | 16.0    | 16.5    | 14.7    | 13.3    | 16.9       | (16.5, 17.2) |           |
| <b>Sex</b>                  |         |         |         |         |         |         |         |         |         |         |            |              |           |
| Female                      | 3.3     | 2.7     | 2.8     | 2.7     | 2.3     | 2.6     | 2.5     | 2.6     | 2.1     | 1.9     | 2.4        | (2.3, 2.4)   | <0.001    |
| Male                        | 3.6     | 3.0     | 3.0     | 3.4     | 3.0     | 3.1     | 2.9     | 3.0     | 2.8     | 2.6     | 2.8        | (2.7, 2.9)   |           |
| <b>Race/ethnicity</b>       |         |         |         |         |         |         |         |         |         |         |            |              |           |
| Hispanic                    | 0.0     | 0.1     | 0.9     | 1.0     | 1.0     | 1.1     | 1.1     | 1.2     | 1.2     | 1.1     | 0.8        | (0.8, 0.9)   | <0.001    |
| Multiple/Other/Unknown      | 1.9     | 1.9     | 1.9     | 1.7     | 1.4     | 1.3     | 1.3     | 1.5     | 1.0     | 0.8     | 1.5        | (1.3, 1.6)   |           |
| Non-Hispanic Asian          | 1.9     | 2.1     | 1.9     | 1.3     | 1.8     | 2.0     | 1.9     | 1.9     | 1.8     | 1.9     | 1.7        | (1.5, 1.8)   |           |
| Non-Hispanic Black          | 4.5     | 2.9     | 2.8     | 3.1     | 3.3     | 3.4     | 3.4     | 2.9     | 3.7     | 2.8     | 3.1        | (2.9, 3.3)   |           |
| Non-Hispanic White          | 6.9     | 5.8     | 5.3     | 5.7     | 4.6     | 5.0     | 4.6     | 4.9     | 4.2     | 4.0     | 4.8        | (4.6, 4.9)   |           |
| <b>Non-influenza season</b> |         |         |         |         |         |         |         |         |         |         |            |              |           |
| <b>Total</b>                | 1.1     | 1.2     | 1.2     | 1.1     | 1.0     | 1.0     | 1.0     | 1.0     | 0.9     | 0.8     | 1.0        | (1.0, 1.0)   |           |

\* Exact 95% CIs for the binomial proportions

\*\* P-value was calculated using Chi-square test
